# Supplementary material for: Performance Characteristics of a High-Throughput Automated Transcription-Mediated Amplification Test for SARS-CoV-2 Detection
Source: PubMed Central journal article supplement (PMC7512162; doi:10.1128/jcm.01669-20), 2020-09-22
Supplement: JCM.01669-20-s0001.pdf [file JCM.01669-20-s0001.pdf]

**A.**

|                    |       | Nasopharyngeal Swab |    |       |
|--------------------|-------|---------------------|----|-------|
|                    |       | +                   | -  | Total |
| OroPharyngeal Swab | +     | 13                  | 0  | 13    |
|                    | -     | 1                   | 21 | 22    |
|                    | Total | 14                  | 21 | 35    |
| Nasal Swab         | +     | 14                  | 0  | 14    |
|                    | -     | 0                   | 21 | 21    |
|                    | Total | 14                  | 21 | 35    |

  

|                     |        |                  |
|---------------------|--------|------------------|
| Overall Agreements  | 97.1%  | (85.5% - 99.5%)  |
| Positive Agreements | 92.9%  | (68.5% - 98.7%)  |
| Negative Agreements | 100.0% | (84.5% - 100.0%) |

**B.**

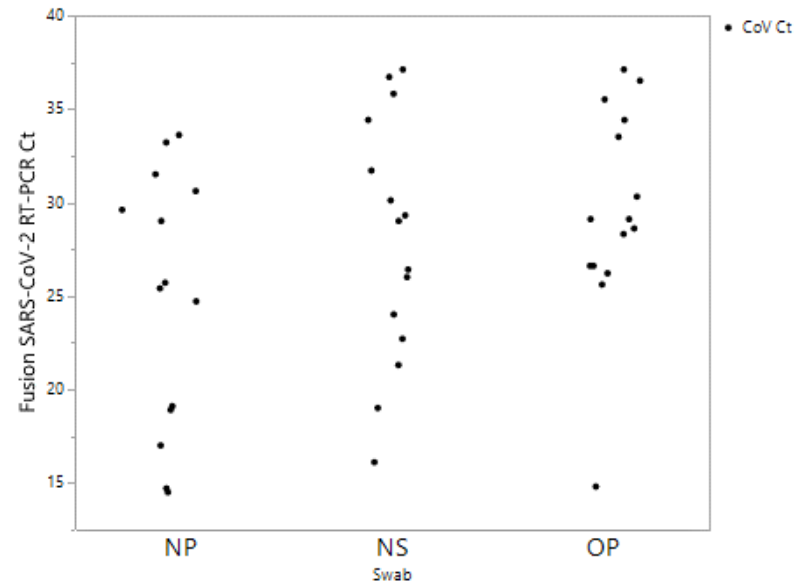

**Supplemental Figure.** Agreement (A) between 35 sets of co-collected nasopharyngeal swab, oropharyngeal swab, and nasal swab clinical specimens with positive (+) and negative (-) Panther Fusion SARS-CoV-2 RT-PCR assay results. Scatter plot (B) of RT-PCR Ct values corresponding to Panther Fusion SARS-CoV-2 RT-PCR assay positive samples for each swab type.

**Supplemental Table 1.** Microorganism cross reactivity and interference of the Aptima SARS-CoV-2 TMA assay.

| Microorganism                | Concentration      | SARS-CoV-2 Unspiked |            |            | SARS-CoV-2 Spiked <sup>a</sup> |            |            |
|------------------------------|--------------------|---------------------|------------|------------|--------------------------------|------------|------------|
|                              |                    | N Tested            | N Detected | % Detected | N Tested                       | N Detected | % Detected |
| No organism Control          | N/A                | 3                   | 0          | 0          | 3                              | 3          | 100        |
| Human coronavirus 229E       | 1.00E+05 TCID50/ml | 3                   | 0          | 0          | 3                              | 3          | 100        |
| Human coronavirus OC43       | 1.00E+05 TCID50/ml | 3                   | 0          | 0          | 3                              | 3          | 100        |
| Human coronavirus HKU1       | 1.00E+06 c/ml      | 3                   | 0          | 0          | 3                              | 3          | 100        |
| Human coronavirus NL63       | 1.00E+04 TCID50/ml | 3                   | 0          | 0          | 3                              | 3          | 100        |
| SARS-coronavirus             | 1.00E+06 c/ml      | 3                   | 0          | 0          | 3                              | 3          | 100        |
| MERS-coronavirus             | 1.00E+04 TCID50/ml | 3                   | 0          | 0          | 3                              | 3          | 100        |
| Adenovirus                   | 1.00E+05 TCID50/ml | 3                   | 0          | 0          | 3                              | 3          | 100        |
| Human Metapneumovirus (hMPV) | 1.00E+06 TCID50/ml | 3                   | 0          | 0          | 3                              | 3          | 100        |
| Parainfluenza virus 1        | 1.00E+05 TCID50/ml | 3                   | 0          | 0          | 3                              | 3          | 100        |
| Parainfluenza virus 2        | 1.00E+05 TCID50/ml | 3                   | 0          | 0          | 3                              | 3          | 100        |
| Parainfluenza virus 3        | 1.00E+05 TCID50/ml | 3                   | 0          | 0          | 3                              | 3          | 100        |
| Parainfluenza virus 4        | 1.00E+03 TCID50/ml | 3                   | 0          | 0          | 3                              | 3          | 100        |
| Influenza A (H3N2)           | 1.00E+05 TCID50/ml | 3                   | 0          | 0          | 3                              | 3          | 100        |

| Microorganism                         | Concentration         | SARS-CoV-2<br>Unspiked |            |            | SARS-CoV-2<br>Spiked <sup>a</sup> |            |            |
|---------------------------------------|-----------------------|------------------------|------------|------------|-----------------------------------|------------|------------|
|                                       |                       | N Tested               | N Detected | % Detected | N Tested                          | N Detected | % Detected |
| Influenza B                           | 2.00E+03<br>TCID50/ml | 3                      | 0          | 0          | 3                                 | 3          | 100        |
| Enterovirus (e.g. EV68)               | 1.00E+05<br>TCID50/ml | 3                      | 0          | 0          | 3                                 | 3          | 100        |
| Respiratory syncytial<br>virus        | 1.00E+05<br>TCID50/ml | 3                      | 0          | 0          | 3                                 | 3          | 100        |
| Rhinovirus                            | 1.00E+04<br>TCID50/ml | 3                      | 0          | 0          | 3                                 | 3          | 100        |
| <i>Chlamydia pneumonia</i>            | 1.00E+06<br>IFU/ml    | 3                      | 0          | 0          | 3                                 | 3          | 100        |
| <i>Haemophilus influenzae</i>         | 1.00E+06<br>CFU/ml    | 3                      | 0          | 0          | 3                                 | 3          | 100        |
| <i>Legionella pneumophila</i>         | 1.00E+06<br>CFU/ml    | 3                      | 0          | 0          | 3                                 | 3          | 100        |
| <i>Mycobacterium<br/>tuberculosis</i> | 1.00E+06<br>TCID50/ml | 3                      | 0          | 0          | 3                                 | 3          | 100        |
| <i>Streptococcus<br/>pneumonia</i>    | 1.00E+06<br>CFU/ml    | 3                      | 0          | 0          | 3                                 | 3          | 100        |
| <i>Streptococcus pyogenes</i>         | 1.00E+06<br>CFU/ml    | 3                      | 0          | 0          | 3                                 | 3          | 100        |
| <i>Bordetella pertussis</i>           | 1.00E+06<br>CFU/ml    | 3                      | 0          | 0          | 3                                 | 3          | 100        |
| <i>Mycoplasma<br/>pneumoniae</i>      | 1.00E+06<br>CFU/ml    | 3                      | 0          | 0          | 3                                 | 3          | 100        |
| <i>Pneumocystis jirovecii</i>         | 1.00E+06<br>nuc/ml    | 3                      | 0          | 0          | 3                                 | 3          | 100        |
| <i>Candida albicans</i>               | 1.00E+06<br>CFU/ml    | 3                      | 0          | 0          | 3                                 | 3          | 100        |
| <i>Pseudomonas<br/>aeruginosa</i>     | 1.00E+06<br>CFU/ml    | 3                      | 0          | 0          | 3                                 | 3          | 100        |

| Microorganism                                            | Concentration   | SARS-CoV-2 Unspiked |            |            | SARS-CoV-2 Spiked <sup>a</sup> |            |            |
|----------------------------------------------------------|-----------------|---------------------|------------|------------|--------------------------------|------------|------------|
|                                                          |                 | N Tested            | N Detected | % Detected | N Tested                       | N Detected | % Detected |
| <i>Staphylococcus epidermidis</i>                        | 1.00E+06 CFU/ml | 3                   | 0          | 0          | 3                              | 3          | 100        |
| <i>Streptococcus salivarius</i>                          | 1.00E+06 CFU/ml | 3                   | 0          | 0          | 3                              | 3          | 100        |
| Negative clinical NP swab specimens (N=30 <sup>b</sup> ) | N/A             | 90                  | 0          | 0          | 90                             | 90         | 100        |

<sup>a</sup>SARS-CoV-2 inactivated cultured virus spiked at 0.03 TCID<sub>50</sub>/ml (3x LoD)

<sup>b</sup>Each NP swab specimen was tested in triplicate for a total of 90 replicates in the absence and presence of spiked SARS-CoV-2 inactivated virus.

Supplemental Table 2. Line listing of results from Table 2 for 140 nasopharyngeal swab specimens tested with the Aptima SARS-CoV-2 assay and the Panther Fusion SARS-CoV-2 assay.

| Sample ID | Aptima SARS-CoV-2 |        | Panther Fusion SARS-CoV-2 |        |
|-----------|-------------------|--------|---------------------------|--------|
|           | RLU (x1000)       | Result | Ct                        | Result |
| 1         | 1164              | POS    | 29.1                      | POS    |
| 2         | 303               | NEG    | 0                         | NEG    |
| 3         | 282               | NEG    | 0                         | NEG    |
| 4         | 297               | NEG    | 0                         | NEG    |
| 5         | 284               | NEG    | 0                         | NEG    |
| 6         | 1163              | POS    | 15                        | POS    |
| 7         | 1140              | POS    | 18.1                      | POS    |
| 8         | 309               | NEG    | 0                         | NEG    |
| 9         | 295               | NEG    | 0                         | NEG    |
| 10        | 1105              | POS    | 30.5                      | POS    |
| 11        | 1142              | POS    | 20.9                      | POS    |
| 12        | 299               | NEG    | 0                         | NEG    |
| 13        | 1140              | POS    | 26.2                      | POS    |
| 14        | 296               | NEG    | 0                         | NEG    |
| 15        | 1105              | POS    | 15.7                      | POS    |
| 16        | 1132              | POS    | 24.4                      | POS    |

|    |      |     |      |     |
|----|------|-----|------|-----|
| 17 | 297  | NEG | 0    | NEG |
| 18 | 300  | NEG | 0    | NEG |
| 19 | 294  | NEG | 0    | NEG |
| 20 | 1182 | POS | 32.1 | POS |
| 21 | 297  | NEG | 0    | NEG |
| 22 | 297  | NEG | 0    | NEG |
| 23 | 306  | NEG | 0    | NEG |
| 24 | 300  | NEG | 0    | NEG |
| 25 | 296  | NEG | 0    | NEG |
| 26 | 299  | NEG | 0    | NEG |
| 27 | 303  | NEG | 0    | NEG |
| 28 | 303  | NEG | 0    | NEG |
| 29 | 1166 | POS | 19.8 | POS |
| 30 | 1187 | POS | 0    | NEG |
| 31 | 1165 | POS | 30.8 | POS |
| 32 | 297  | NEG | 0    | NEG |
| 33 | 1187 | POS | 28   | POS |
| 34 | 1172 | POS | 32.4 | POS |
| 35 | 1107 | POS | 30.9 | POS |
| 36 | 303  | NEG | 0    | NEG |
| 37 | 314  | NEG | 0    | NEG |
| 38 | 311  | NEG | 0    | NEG |
| 39 | 297  | NEG | 0    | NEG |
| 40 | 1182 | POS | 29.7 | POS |
| 41 | 306  | NEG | 0    | NEG |
| 42 | 1108 | POS | 21.9 | POS |
| 43 | 294  | NEG | 0    | NEG |
| 44 | 295  | NEG | 0    | NEG |
| 45 | 286  | NEG | 0    | NEG |
| 46 | 291  | NEG | 0    | NEG |
| 47 | 283  | NEG | 0    | NEG |
| 48 | 287  | NEG | 0    | NEG |
| 49 | 1184 | POS | 21.8 | POS |
| 50 | 1171 | POS | 24.1 | POS |
| 51 | 289  | NEG | 0    | NEG |
| 52 | 1192 | POS | 29.4 | POS |
| 53 | 1192 | POS | 23.2 | POS |
| 54 | 1196 | POS | 22.2 | POS |
| 55 | 1204 | POS | 24.7 | POS |
| 56 | 1165 | POS | 31.2 | POS |
| 57 | 287  | NEG | 0    | NEG |
| 58 | 288  | NEG | 0    | NEG |
| 59 | 290  | NEG | 0    | NEG |

|     |      |     |      |     |
|-----|------|-----|------|-----|
| 60  | 288  | NEG | 0    | NEG |
| 61  | 284  | NEG | 0    | NEG |
| 62  | 275  | NEG | 0    | NEG |
| 63  | 285  | NEG | 0    | NEG |
| 64  | 294  | NEG | 0    | NEG |
| 65  | 1182 | POS | 22.3 | POS |
| 66  | 288  | NEG | 0    | NEG |
| 67  | 1176 | POS | 30.8 | POS |
| 68  | 1154 | POS | 22.3 | POS |
| 69  | 296  | NEG | 0    | NEG |
| 70  | 295  | NEG | 0    | NEG |
| 71  | 304  | NEG | 0    | NEG |
| 72  | 1155 | POS | 17   | POS |
| 73  | 292  | NEG | 0    | NEG |
| 74  | 1187 | POS | 19.7 | POS |
| 75  | 1207 | POS | 22.5 | POS |
| 76  | 283  | NEG | 0    | NEG |
| 77  | 1181 | POS | 18.3 | POS |
| 78  | 295  | NEG | 0    | NEG |
| 79  | 294  | NEG | 0    | NEG |
| 80  | 1231 | POS | 31.1 | POS |
| 81  | 290  | NEG | 0    | NEG |
| 82  | 285  | NEG | 0    | NEG |
| 83  | 303  | NEG | 0    | NEG |
| 84  | 299  | NEG | 0    | NEG |
| 85  | 1228 | POS | 27.1 | POS |
| 86  | 288  | NEG | 0    | NEG |
| 87  | 272  | NEG | 0    | NEG |
| 88  | 1203 | POS | 19.5 | POS |
| 89  | 1189 | POS | 16.3 | POS |
| 90  | 1130 | POS | 20   | POS |
| 91  | 1167 | POS | 33.1 | POS |
| 92  | 1139 | POS | 17.5 | POS |
| 93  | 1126 | POS | 24.2 | POS |
| 94  | 1140 | POS | 24.3 | POS |
| 95  | 1154 | POS | 16   | POS |
| 96  | 1107 | POS | 19.8 | POS |
| 97  | 1127 | POS | 33.6 | POS |
| 98  | 1147 | POS | 20.7 | POS |
| 99  | 1116 | POS | 22.2 | POS |
| 100 | 1152 | POS | 17.8 | POS |
| 101 | 1129 | POS | 24   | POS |
| 102 | 1186 | POS | 24.2 | POS |

|     |      |     |      |     |
|-----|------|-----|------|-----|
| 103 | 1105 | POS | 21.8 | POS |
| 104 | 1168 | POS | 35.3 | POS |
| 105 | 1169 | POS | 25.6 | POS |
| 106 | 283  | NEG | 0    | NEG |
| 107 | 284  | NEG | 0    | NEG |
| 108 | 285  | NEG | 0    | NEG |
| 109 | 289  | NEG | 0    | NEG |
| 110 | 293  | NEG | 0    | NEG |
| 111 | 288  | NEG | 0    | NEG |
| 112 | 283  | NEG | 0    | NEG |
| 113 | 285  | NEG | 0    | NEG |
| 114 | 290  | NEG | 0    | NEG |
| 115 | 292  | NEG | 0    | NEG |
| 116 | 282  | NEG | 0    | NEG |
| 117 | 284  | NEG | 0    | NEG |
| 118 | 280  | NEG | 0    | NEG |
| 119 | 287  | NEG | 0    | NEG |
| 120 | 291  | NEG | 0    | NEG |
| 121 | 1123 | POS | 33.2 | POS |
| 122 | 1121 | POS | 33.6 | POS |
| 123 | 1096 | POS | 29.6 | POS |
| 124 | 1100 | POS | 19.1 | POS |
| 125 | 1111 | POS | 25.4 | POS |
| 126 | 1116 | POS | 18.9 | POS |
| 127 | 1129 | POS | 14.7 | POS |
| 128 | 1125 | POS | 25.7 | POS |
| 129 | 1111 | POS | 30.6 | POS |
| 130 | 1109 | POS | 14.5 | POS |
| 131 | 290  | NEG | 0    | NEG |
| 132 | 283  | NEG | 0    | NEG |
| 133 | 296  | NEG | 0    | NEG |
| 134 | 283  | NEG | 0    | NEG |
| 135 | 295  | NEG | 0    | NEG |
| 136 | 283  | NEG | 0    | NEG |
| 137 | 1081 | POS | 29   | POS |
| 138 | 1096 | POS | 17   | POS |
| 139 | 1107 | POS | 31.5 | POS |
| 140 | 1093 | POS | 24.7 | POS |

---
